# Supplementary material for: Accumulation Patterns of Metabolites Responsible for the Functional Quality of Virgin Olive Oil during Olive Fruit Ontogeny
Source: MDPI journal article supplement (doi:10.3390/antiox13010012), 2023-12-20
Supplement: s1 [file s1]

Table S1. Content of the main the phenolic compounds (µg/g FW), individual and groups of compounds, in olive fruits of seven cultivars and three genotypes from the cross of cultivars ‘Picual’ x ‘Arbequina’ along the development and ripening. Fruit harvest was carried out by hand throughout the fruit development from 3 to 20 weeks after flowering (WAF) and the ripening process: R-I, olive fruits with green-yellowish epidermis (MI = 1); R-II, turning olive fruits, around 50% color (MI = 2.5); and R-III, fully colored fruits with white mesocarp (MI = 4). Data are the mean plus-minus standard deviation from two extractions and analyses.

| Genotype / stage | hydroxytyrosol-1'-O-glucoside + hydroxytyrosol-4-O-glucoside |                 | demethyloleuropein |                     | oleuropein         |                  | ligstroside     |                  | oleuropein aglycone |                 | ligstroside aglycone |                 | verbascoside     |                | ratin       |             | luteolin-7-O-glucoside |                    | apigenin-7-O-glucoside |                | cyanidin-3-O-glucoside |  | cyanidin-3-O-rutinoside |  | α-tocopherol |  | β-tocopherol |  | γ-tocopherol |  | Hydroxytyrosol derivatives (Hty-Den) |  | Tyrosol derivatives (Ty-Den) |  | Flavonoids |  | Tocopherols |  |
|------------------|--------------------------------------------------------------|-----------------|--------------------|---------------------|--------------------|------------------|-----------------|------------------|---------------------|-----------------|----------------------|-----------------|------------------|----------------|-------------|-------------|------------------------|--------------------|------------------------|----------------|------------------------|--|-------------------------|--|--------------|--|--------------|--|--------------|--|--------------------------------------|--|------------------------------|--|------------|--|-------------|--|
|                  |                                                              |                 |                    |                     |                    |                  |                 |                  |                     |                 |                      |                 |                  |                |             |             |                        |                    |                        |                |                        |  |                         |  |              |  |              |  |              |  |                                      |  |                              |  |            |  |             |  |
| Dokkar 3 WAF     | 1527.54 ± 49.40                                              | 743.21 ± 7.45   | 18.76 ± 1.46       | 111245.68 ± 115.79  | 25607.55 ± 294.34  | 307.62 ± 72.18   | 151.25 ± 0.98   | 614.37 ± 6.05    | 639.69 ± 85.25      | 84.50 ± 19.32   | 12.54 ± 3.49         | 0.00 ± 0.00     | 0.00 ± 0.00      | 41.58 ± 0.60   | 0.45 ± 0.05 | 2.33 ± 0.21 | 113713.98 ± 241.97     | 26502.01 ± 300.81  | 736.74 ± 108.06        | 44.36 ± 0.45   |                        |  |                         |  |              |  |              |  |              |  |                                      |  |                              |  |            |  |             |  |
| Dokkar 8 WAF     | 1561.20 ± 43.01                                              | 1424.72 ± 7.89  | 10.32 ± 0.17       | 113427.28 ± 2137.95 | 25563.40 ± 521.15  | 288.71 ± 11.48   | 113.35 ± 14.63  | 2544.14 ± 8.35   | 328.13 ± 21.21      | 82.68 ± 2.29    | 6.64 ± 0.05          | 0.00 ± 0.00     | 0.00 ± 0.00      | 34.73 ± 1.44   | 0.36 ± 0.13 | 1.29 ± 0.11 | 117831.66 ± 2114.60    | 27101.47 ± 498.63  | 417.45 ± 23.45         | 36.37 ± 1.68   |                        |  |                         |  |              |  |              |  |              |  |                                      |  |                              |  |            |  |             |  |
| Dokkar 12 WAF    | 2180.83 ± 142.43                                             | 671.54 ± 2.40   | 10.59 ± 0.59       | 79643.12 ± 1541.40  | 26950.15 ± 740.07  | 721.88 ± 410.16  | 376.16 ± 150.75 | 5554.58 ± 47.01  | 509.67 ± 47.92      | 168.38 ± 40.10  | 376.16 ± 3.00        | 0.00 ± 0.00     | 0.00 ± 0.00      | 120.63 ± 4.66  | 0.48 ± 0.02 | 2.55 ± 1.00 | 88111.01 ± 1855.56     | 27997.85 ± 586.92  | 684.73 ± 91.01         | 123.65 ± 5.64  |                        |  |                         |  |              |  |              |  |              |  |                                      |  |                              |  |            |  |             |  |
| Dokkar 16 WAF    | 2505.37 ± 323.47                                             | 166.51 ± 10.65  | 35.21 ± 1.29       | 82548.58 ± 2595.23  | 14582.79 ± 1367.09 | 4068.00 ± 537.51 | 750.25 ± 50.74  | 4634.87 ± 43.65  | 866.53 ± 16.27      | 323.80 ± 40.92  | 75.68 ± 7.09         | 0.00 ± 0.00     | 0.00 ± 0.00      | 206.28 ± 8.18  | 0.37 ± 0.03 | 3.32 ± 0.07 | 93792.03 ± 1779.18     | 15499.55 ± 1428.48 | 1266.01 ± 31.74        | 209.97 ± 8.22  |                        |  |                         |  |              |  |              |  |              |  |                                      |  |                              |  |            |  |             |  |
| Dokkar 20 WAF    | 1627.93 ± 78.93                                              | 149.50 ± 5.93   | 30.14 ± 17.92      | 70515.67 ± 5410.15  | 11500.26 ± 1204.13 | 7209.94 ± 613.86 | 1234.50 ± 83.30 | 5055.95 ± 437.11 | 772.29 ± 244.78     | 241.13 ± 50.15  | 76.12 ± 21.55        | 0.00 ± 0.00     | 0.00 ± 0.00      | 222.59 ± 1.80  | 0.39 ± 0.11 | 5.34 ± 0.26 | 84439.63 ± 6400.02     | 12884.26 ± 1281.50 | 1089.53 ± 316.48       | 228.32 ± 2.17  |                        |  |                         |  |              |  |              |  |              |  |                                      |  |                              |  |            |  |             |  |
| Dokkar R-I       | 1285.48 ± 4.66                                               | 91.26 ± 4.67    | 9.63 ± 3.75        | 52199.22 ± 349.77   | 7858.75 ± 414.05   | 7554.50 ± 234.26 | 1118.97 ± 69.42 | 3628.26 ± 39.81  | 529.77 ± 40.49      | 232.11 ± 9.72   | 54.85 ± 1.25         | 0.00 ± 0.00     | 0.00 ± 0.00      | 211.06 ± 9.45  | 0.71 ± 0.30 | 5.77 ± 0.04 | 64677.09 ± 146.91      | 9068.98 ± 488.14   | 816.73 ± 29.53         | 217.55 ± 9.71  |                        |  |                         |  |              |  |              |  |              |  |                                      |  |                              |  |            |  |             |  |
| Dokkar R-II      | 1286.71 ± 55.33                                              | 116.85 ± 10.75  | 2137.32 ± 66.12    | 41521.52 ± 2228.25  | 6011.46 ± 718.51   | 8206.04 ± 483.30 | 1129.53 ± 7.78  | 3621.49 ± 142.10 | 392.62 ± 4.58       | 152.54 ± 39.38  | 32.09 ± 6.08         | 321.94 ± 42.80  | 878.29 ± 76.03   | 189.64 ± 5.21  | 0.78 ± 0.11 | 6.12 ± 0.11 | 56773.08 ± 2008.50     | 7257.84 ± 737.04   | 1777.48 ± 168.86       | 196.54 ± 5.43  |                        |  |                         |  |              |  |              |  |              |  |                                      |  |                              |  |            |  |             |  |
| Dokkar R-III     | 1610.15 ± 33.87                                              | 191.22 ± 4.58   | 33943.82 ± 557.57  | 5872.05 ± 1040.00   | 5236.75 ± 21.65    | 205.55 ± 1.51    | 21.19 ± 20.12   | 3532.00 ± 62.99  | 492.85 ± 87.49      | 151.51 ± 27.98  | 28.81 ± 7.38         | 2533.58 ± 67.46 | 8899.97 ± 312.25 | 230.36 ± 7.64  | 1.06 ± 0.04 | 4.91 ± 0.14 | 45163.58 ± 580.81      | 5449.15 ± 6.12     | 12106.71 ± 256.87      | 236.33 ± 7.74  |                        |  |                         |  |              |  |              |  |              |  |                                      |  |                              |  |            |  |             |  |
| Menya 3 WAF      | 581.90 ± 0.93                                                | 448.05 ± 28.36  | 22.61 ± 4.14       | 90333.52 ± 4635.25  | 19668.40 ± 1603.70 | 691.15 ± 164.75  | 299.44 ± 47.90  | 69.11 ± 9.13     | 1803.34 ± 221.49    | 382.75 ± 86.73  | 141.38 ± 17.59       | 0.00 ± 0.00     | 0.00 ± 0.00      | 22.34 ± 1.27   | 0.35 ± 0.01 | 1.76 ± 0.04 | 91698.29 ± 4456.30     | 20415.89 ± 1584.16 | 2327.48 ± 152.36       | 24.44 ± 1.29   |                        |  |                         |  |              |  |              |  |              |  |                                      |  |                              |  |            |  |             |  |
| Menya 8 WAF      | 1421.39 ± 30.90                                              | 1148.59 ± 39.86 | 42.26 ± 1.48       | 82523.38 ± 2087.18  | 15698.35 ± 350.34  | 534.82 ± 89.13   | 245.70 ± 25.76  | 20.32 ± 0.83     | 1073.41 ± 77.58     | 486.51 ± 36.11  | 70.47 ± 1.68         | 0.00 ± 0.00     | 0.00 ± 0.00      | 38.95 ± 1.16   | 0.37 ± 0.06 | 0.68 ± 0.08 | 84542.18 ± 2209.52     | 17092.64 ± 415.96  | 1630.39 ± 115.37       | 39.99 ± 1.02   |                        |  |                         |  |              |  |              |  |              |  |                                      |  |                              |  |            |  |             |  |
| Menya 12 WAF     | 417.47 ± 185.74                                              | 197.30 ± 60.35  | 43.17 ± 1.66       | 74160.63 ± 4547.11  | 13319.43 ± 2110.92 | 444.72 ± 131.56  | 234.62 ± 56.48  | 63.61 ± 9.45     | 1146.74 ± 182.63    | 543.86 ± 103.32 | 80.21 ± 0.71         | 0.00 ± 0.00     | 0.00 ± 0.00      | 92.81 ± 8.44   | 0.51 ± 0.00 | 0.98 ± 0.09 | 75129.60 ± 4485.14     | 13751.35 ± 2107.05 | 1770.81 ± 286.66       | 94.30 ± 8.36   |                        |  |                         |  |              |  |              |  |              |  |                                      |  |                              |  |            |  |             |  |
| Menya 16 WAF     | 758.68 ± 27.10                                               | 347.84 ± 10.09  | 61.80 ± 4.35       | 51218.46 ± 398.98   | 6250.32 ± 495.74   | 761.34 ± 65.51   | 279.27 ± 11.30  | 242.64 ± 4.87    | 1242.17 ± 130.66    | 538.12 ± 23.36  | 134.22 ± 17.01       | 0.00 ± 0.00     | 0.00 ± 0.00      | 144.09 ± 5.71  | 1.46 ± 0.23 | 3.21 ± 0.23 | 53042.92 ± 297.15      | 6877.42 ± 474.35   | 1914.51 ± 171.03       | 148.76 ± 5.72  |                        |  |                         |  |              |  |              |  |              |  |                                      |  |                              |  |            |  |             |  |
| Menya 20 WAF     | 726.50 ± 30.03                                               | 161.59 ± 13.86  | 53.18 ± 3.67       | 49268.24 ± 1757.56  | 6402.01 ± 350.93   | 125.87 ± 37.33   | 109.71 ± 15.85  | 322.67 ± 23.06   | 1023.30 ± 111.69    | 408.25 ± 28.23  | 97.27 ± 11.94        | 0.00 ± 0.00     | 0.00 ± 0.00      | 137.93 ± 6.64  | 1.48 ± 0.08 | 2.98 ± 0.51 | 50496.46 ± 1769.65     | 6673.31 ± 348.93   | 1528.82 ± 151.86       | 142.39 ± 7.23  |                        |  |                         |  |              |  |              |  |              |  |                                      |  |                              |  |            |  |             |  |
| Menya R-I        | 726.50 ± 30.03                                               | 161.59 ± 13.86  | 53.18 ± 3.67       | 39268.24 ± 1757.56  | 5402.01 ± 350.93   | 125.87 ± 37.33   | 109.71 ± 15.85  | 322.67 ± 23.06   | 1023.30 ± 111.69    | 408.25 ± 28.23  | 97.27 ± 11.94        | 0.00 ± 0.00     | 0.00 ± 0.00      | 154.98 ± 9.39  | 2.10 ± 0.11 | 2.97 ± 0.73 | 40496.46 ± 1769.65     | 5673.31 ± 348.93   | 1528.82 ± 151.86       | 160.05 ± 10.23 |                        |  |                         |  |              |  |              |  |              |  |                                      |  |                              |  |            |  |             |  |
| Menya R-II       | 752.42 ± 64.46                                               | 82.55 ± 14.07   | 597.48 ± 28.33     | 28939.35 ± 249.31   | 3977.22 ± 344.03   | 788.11 ± 110.76  | 124.42 ± 6.34   | 629.53 ± 55.93   | 686.04 ± 45.95      | 331.13 ± 16.13  | 56.29 ± 2.88         | 14.24 ± 0.72    | 310.64 ± 9.38    | 122.39 ± 22.64 | 1.40 ± 0.01 | 2.62 ± 0.54 | 31706.90 ± 452.13      | 4184.20 ± 364.44   | 1398.33 ± 54.86        | 126.41 ± 23.16 |                        |  |                         |  |              |  |              |  |              |  |                                      |  |                              |  |            |  |             |  |
| Menya R-III      | 1129.96 ± 24.15                                              | 105.13 ± 6.86   | 12327.46 ± 42.75   | 4826.15 ± 287.94    | 705.47 ± 26.33     | 85.64 ± 25.60    | 38.65 ± 14.58   | 526.23 ± 6.73    | 431.91 ± 8.87       | 212.32 ± 8.01   | 19.32 ± 2.60         | 235.22 ± 15.79  | 5811.23 ± 221.14 | 142.85 ± 0.78  | 1.58 ± 0.03 | 3.12 ± 0.53 | 18895.44 ± 202.17      | 849.26 ± 4.90      | 6709.99 ± 217.44       | 147.56 ± 1.28  |                        |  |                         |  |              |  |              |  |              |  |                                      |  |                              |  |            |  |             |  |
| Piñonera 3 WAF   | 1176.18 ± 39.56                                              | 1052.22 ± 22.36 | 28.26 ± 1.43       | 76649.90 ± 3363.96  | 26188.80 ± 1266.42 | 119.13 ± 10.30   | 127.56 ± 7.00   | 65.35 ± 1.51     | 2474.57 ± 329.67    | 334.22 ± 32.06  | 34.54 ± 5.05         | 0.00 ± 0.00     | 0.00 ± 0.00      | 34.10 ± 0.28   | 0.47 ± 0.07 | 2.55 ± 0.42 | 78038.82 ± 3393.14     | 27368.59 ± 1281.78 | 2843.32 ± 366.78       | 37.12 ± 2.67   |                        |  |                         |  |              |  |              |  |              |  |                                      |  |                              |  |            |  |             |  |
| Piñonera 8 WAF   | 533.94 ± 55.91                                               | 1057.86 ± 43.31 | 27.35 ± 31.22      | 70866.31 ± 1568.45  | 26686.23 ± 67.89   | 387.41 ± 32.01   | 256.45 ± 15.52  | 517.72 ± 42.23   | 1383.56 ± 456.22    | 343.43 ± 25.63  | 29.68 ± 13.84        | 0.00 ± 0.00     | 0.00 ± 0.00      | 38.66 ± 3.64   | 0.29 ± 0.01 | 0.53 ± 0.04 | 72332.73 ± 1582.91     | 28000.54 ± 9.06    | 1756.67 ± 495.69       | 39.48 ± 3.67   |                        |  |                         |  |              |  |              |  |              |  |                                      |  |                              |  |            |  |             |  |
| Piñonera 12 WAF  | 2242.25 ± 127.49                                             | 984.08 ± 206.79 | 65.27 ± 13.22      | 53288.60 ± 113.62   | 12269.17 ± 962.92  | 323.37 ± 267.23  | 180.72 ± 129.24 | 2415.05 ± 116.32 | 1529.               |                 |                      |                 |                  |                |             |             |                        |                    |                        |                |                        |  |                         |  |              |  |              |  |              |  |                                      |  |                              |  |            |  |             |  |

Table S2. Content of the main the phenolic compounds ( µg/g oil), individual and groups of compounds, in olive oils extracted from seven cultivars and three genotypes from the cross of cultivars ‘Picual’ × ‘Arbequina’ along the ripening. Fruit harvest was carried out by hand throughout the fruit ripening process: R-I, olive fruits with green-yellowish epidermis (MI = 1); R-II, turning olive fruits, around 50% color (MI = 2.5); and R-III, fully colored fruits with white mesocarp (MI = 4). Data are the mean plus-minus standard deviation from two extractions and analyses.

| Genotype / stage  | hidroxytyrosol (HTy) | tyrosol (Ty) | vanillic acid | vainillin | p-coumaric acid | hidroxytyrosol acetate | 3,4-DHPEA-DEA (oleacein) | p-HPEA-DEA (oleocanthal) | pinoresinol | cinnamic acid | acetoxypinoresinol | 3,4-DHPEA-EA (oleuropein aglycone) | p-HPEA-EA (ligstroside aglycone) | ferulic acid | luteolin   | apigenin  | α-tocopherol  | β-tocopherol | γ-tocopherol | Hydroxytyrosol derivatives (HTy-Der) | Tyrosol derivatives (Ty-Der) | Flavonoids | Lignans    | Simple phenols | Tocopherols   |
|-------------------|----------------------|--------------|---------------|-----------|-----------------|------------------------|--------------------------|--------------------------|-------------|---------------|--------------------|------------------------------------|----------------------------------|--------------|------------|-----------|---------------|--------------|--------------|--------------------------------------|------------------------------|------------|------------|----------------|---------------|
| Dokkar R-I        | 11.16±0.41           | 7.29±0.55    | 0.11±0.03     | 0.20±0.02 | 0.19±0.04       | 1.04±0.19              | 48.09±0.10               | 36.43±20.14              | 1.13±0.08   | 0.18±0.11     | 2.74±0.00          | 945.90±11.82                       | 863.07±16.21                     | 0.02±0.00    | 0.67±0.09  | 0.23±0.02 | 1311.62±77.49 | 5.53±0.55    | 16.08±1.01   | 1006.18±12.14                        | 906.79±36.90                 | 0.90±0.11  | 3.87±0.08  | 0.69±0.08      | 1333.22±79.05 |
| Dokkar R-II       | 13.13±0.58           | 7.36±0.28    | 0.13±0.01     | 0.13±0.01 | 0.20±0.00       | 1.02±0.04              | 104.08±3.50              | 112.04±1.49              | 1.40±0.63   | 0.07±0.02     | 2.21±0.07          | 829.00±51.11                       | 653.86±14.56                     | 0.02±0.00    | 0.92±0.03  | 0.27±0.01 | 1202.40±56.49 | 5.05±0.52    | 20.55±2.48   | 947.23±55.23                         | 773.26±16.33                 | 1.19±0.04  | 3.61±0.56  | 0.55±0.04      | 1228.01±59.49 |
| Dokkar R-III      | 4.07±0.07            | 2.92±0.17    | 0.10±0.03     | 0.12±0.00 | 0.13±0.00       | 10.28±0.13             | 667.71±37.37             | 519.93±2.39              | 1.70±0.13   | 0.04±0.00     | 0.62±0.16          | 309.07±26.35                       | 167.43±4.87                      | 0.02±0.00    | 0.63±0.02  | 0.18±0.02 | 954.81±4.23   | 7.23±0.52    | 7.67±0.39    | 991.13±11.08                         | 690.27±7.43                  | 0.82±0.00  | 2.32±0.02  | 0.41±0.03      | 969.70±4.35   |
| Menya R-I         | 6.25±1.64            | 15.13±1.24   | 0.07±0.05     | 0.17±0.01 | 0.01±0.00       | 1.17±0.36              | 7.42±0.52                | 47.88±0.89               | 0.99±0.08   | 0.09±0.02     | 4.58±0.29          | 479.29±1.18                        | 451.05±17.26                     | 0.01±0.00    | 0.53±0.01  | 0.15±0.00 | 625.31±0.15   | 0.75±1.07    | 16.15±1.39   | 494.13±3.71                          | 514.06±16.91                 | 0.68±0.01  | 5.58±0.37  | 0.35±0.02      | 642.22±2.60   |
| Menya R-II        | 12.44±2.22           | 13.78±2.04   | 0.25±0.03     | 0.15±0.01 | 0.03±0.01       | 1.53±0.13              | 38.54±3.80               | 65.18±9.27               | 0.98±0.08   | 0.06±0.00     | 7.68±0.23          | 212.35±21.84                       | 279.53±18.80                     | 0.03±0.00    | 2.52±0.10  | 0.32±0.03 | 461.48±1.99   | 0.78±0.07    | 8.98±0.26    | 264.85±23.29                         | 358.49±26.03                 | 2.84±0.13  | 8.67±0.15  | 0.51±0.01      | 471.24±1.66   |
| Menya R-III       | 7.18±0.22            | 11.59±0.54   | 0.31±0.00     | 0.13±0.01 | 0.16±0.00       | 12.32±0.17             | 90.88±0.38               | 110.04±1.69              | 1.74±0.05   | 0.07±0.01     | 15.57±0.01         | 95.28±3.57                         | 100.12±0.13                      | 0.03±0.00    | 4.76±0.01  | 0.37±0.03 | 435.48±2.82   | 0.32±0.45    | 11.09±2.82   | 205.66±3.55                          | 221.76±2.37                  | 5.12±0.04  | 17.31±0.05 | 0.69±0.00      | 446.89±0.45   |
| Piñonera R-I      | 1.35±0.08            | 6.66±0.27    | 0.78±0.04     | 0.19±0.02 | 0.48±0.02       | 2.98±0.21              | 206.03±0.23              | 227.49±4.51              | 1.03±0.00   | 0.28±0.03     | 1.34±0.01          | 39.52±0.59                         | 37.09±8.94                       | 0.07±0.00    | 3.78±0.11  | 0.54±0.07 | 689.33±20.97  | 1.14±0.46    | 4.54±0.20    | 249.87±0.65                          | 271.24±13.71                 | 4.31±0.18  | 2.37±0.01  | 1.80±0.06      | 695.01±21.62  |
| Piñonera R-II     | 1.55±0.02            | 7.99±0.01    | 0.78±0.01     | 0.21±0.01 | 0.48±0.00       | 2.15±0.11              | 206.89±6.92              | 246.04±7.66              | 1.37±0.15   | 0.35±0.01     | 1.58±0.07          | 41.04±0.40                         | 30.98±2.51                       | 0.06±0.00    | 4.42±0.13  | 0.66±0.01 | 746.34±18.04  | 1.23±0.05    | 3.90±0.67    | 251.63±7.19                          | 285.01±5.16                  | 5.08±0.14  | 2.96±0.22  | 1.89±0.03      | 751.46±18.66  |
| Piñonera R-III    | 3.60±0.19            | 14.60±0.45   | 0.54±0.01     | 0.21±0.02 | 0.49±0.02       | 8.31±0.54              | 259.81±5.40              | 177.05±2.62              | 1.48±0.08   | 0.56±0.04     | 1.49±0.02          | 27.26±3.17                         | 19.49±3.24                       | 0.07±0.00    | 5.50±0.77  | 0.55±0.15 | 827.80±12.43  | 1.48±0.34    | 9.10±0.74    | 298.98±9.30                          | 211.13±6.32                  | 6.04±0.92  | 2.97±0.05  | 1.86±0.01      | 838.38±13.51  |
| Abou kanani R-I   | 6.70±0.29            | 2.96±0.25    | 0.61±0.09     | 0.29±0.02 | 0.16±0.21       | 5.50±0.76              | 23.36±4.18               | 11.79±0.75               | 2.69±0.13   | 0.09±0.02     | 13.47±0.22         | 70.68±7.80                         | 5.43±0.33                        | 0.19±0.02    | 2.15±0.06  | 1.03±0.10 | 359.68±22.65  | 0.51±0.02    | 1.03±0.98    | 106.24±4.09                          | 20.18±0.83                   | 3.18±0.16  | 16.16±0.34 | 1.34±0.28      | 361.23±21.68  |
| Abou kanani R-II  | 3.95±0.52            | 1.70±0.15    | 0.24±0.01     | 0.13±0.02 | 0.29±0.03       | 4.62±0.11              | 22.47±0.57               | 8.52±1.06                | 2.46±0.12   | 0.06±0.01     | 10.91±0.68         | 64.34±4.65                         | 2.66±0.17                        | 0.13±0.00    | 5.16±0.08  | 1.05±0.00 | 213.87±0.57   | 0.96±0.10    | 2.01±0.17    | 95.38±5.85                           | 12.88±1.38                   | 6.21±0.07  | 13.37±0.79 | 0.85±0.07      | 216.85±0.85   |
| Abou kanani R-III | 2.06±0.07            | 0.76±0.09    | 0.28±0.01     | 0.17±0.01 | 0.10±0.02       | 4.61±0.12              | 5.76±1.47                | 2.53±1.09                | 1.29±0.08   | 0.03±0.01     | 7.30±0.24          | 18.14±1.73                         | 1.33±2.55                        | 0.06±0.01    | 3.96±0.17  | 0.63±0.09 | 167.21±12.41  | 0.97±0.48    | 6.09±0.55    | 30.57±2.97                           | 4.62±3.20                    | 4.59±0.25  | 8.59±0.30  | 0.64±0.03      | 174.26±12.48  |
| Fishomi R-I       | 2.96±0.28            | 5.67±0.18    | 0.69±0.01     | 0.23±0.02 | 1.00±0.08       | 3.03±0.30              | 31.44±4.15               | 26.57±2.32               | 2.02±0.01   | 0.10±0.02     | 3.21±0.07          | 48.59±4.20                         | 34.10±0.94                       | 0.27±0.01    | 5.16±0.17  | 0.88±0.01 | 342.25±2.16   | 4.30±0.39    | 2.28±0.81    | 86.02±8.95                           | 66.35±3.44                   | 6.03±0.16  | 5.23±0.08  | 2.29±0.11      | 348.83±2.58   |
| Fishomi R-II      | 3.02±0.06            | 5.11±0.08    | 0.76±0.01     | 0.21±0.02 | 0.62±0.01       | 2.14±0.10              | 22.13±1.30               | 21.27±1.13               | 1.84±0.00   | 0.10±0.02     | 2.78±0.01          | 52.56±2.23                         | 38.36±1.24                       | 0.19±0.02    | 6.38±0.23  | 1.05±0.06 | 339.37±31.99  | 3.17±0.66    | 1.45±0.01    | 79.86±3.37                           | 64.74±0.19                   | 7.43±0.28  | 4.62±0.00  | 1.88±0.01      | 343.99±31.34  |
| Fishomi R-III     | 3.19±0.06            | 4.26±0.12    | 0.37±0.02     | 0.17±0.02 | 0.27±0.01       | 1.40±0.01              | 18.69±1.03               | 15.17±0.99               | 1.39±0.09   | 0.10±0.02     | 3.08±0.07          | 115.09±3.56                        | 49.34±4.04                       | 0.10±0.00    | 7.79±0.45  | 0.87±0.13 | 288.41±5.79   | 3.12±0.62    | 0.54±0.12    | 138.36±4.65                          | 68.77±5.14                   | 8.65±0.58  | 4.47±0.16  | 1.01±0.02      | 292.07±5.05   |
| Picual R-I        | 1.41±0.03            | 1.24±0.14    | 0.47±0.02     | 0.10±0.00 | 1.11±0.01       | 2.48±0.07              | 43.63±1.16               | 27.35±0.80               | 0.81±0.08   | 0.03±0.01     | 2.40±0.53          | 158.95±0.52                        | 94.35±8.38                       | 0.12±0.01    | 4.27±0.03  | 1.33±0.04 | 237.29±20.50  | 3.03±0.67    | 6.28±0.72    | 206.46±1.65                          | 122.94±7.73                  | 5.60±0.06  | 3.21±0.61  | 1.83±0.02      | 246.61±20.45  |
| Picual R-II       | 1.24±0.07            | 2.32±0.17    | 0.35±0.01     | 0.09±0.00 | 1.25±0.02       | 2.24±0.16              | 18.99±0.03               | 16.18±0.15               | 0.88±0.12   | 0.01±0.00     | 2.21±0.46          | 107.58±0.17                        | 77.48±3.18                       | 0.26±0.00    | 5.56±0.03  | 1.47±0.08 | 206.22±6.61   | 2.98±0.51    | 12.79±0.85   | 130.05±0.42                          | 95.98±3.19                   | 7.04±0.05  | 3.10±0.59  | 1.96±0.02      | 221.98±5.25   |
| Picual R-III      | 2.19±0.04            | 4.64±0.01    | 0.35±0.02     | 0.06±0.00 | 0.92±0.01       | 2.04±0.03              | 16.26±0.05               | 11.84±0.22               | 0.70±0.12   | 0.01±0.00     | 2.81±0.31          | 102.20±0.37                        | 62.32±4.71                       | 0.28±0.01    | 6.41±0.01  | 1.13±0.02 | 230.16±9.80   | 2.88±0.36    | 13.18±1.35   | 122.70±0.43                          | 78.80±4.49                   | 7.53±0.02  | 3.51±0.42  | 1.62±0.04      | 246.22±10.80  |
| Arbequina R-I     | 1.16±0.01            | 1.51±0.04    | 0.96±0.01     | 0.20±0.00 | 0.62±0.04       | 10.49±0.06             | 131.42±3.57              | 82.60±2.20               | 2.67±0.08   | 0.09±0.00     | 28.05±0.01         | 17.32±1.53                         | 1.57±0.04                        | 0.11±0.00    | 7.20±0.08  | 2.38±0.10 | 288.08±26.24  | 0.08±0.12    | 1.69±0.53    | 160.39±1.99                          | 85.68±2.12                   | 9.59±0.18  | 30.72±0.07 | 1.98±0.02      | 289.86±26.13  |
| Arbequina R-II    | 1.81±0.04            | 1.45±0.08    | 0.70±0.03     | 0.15±0.00 | 0.50±0.01       | 22.01±0.33             | 98.74±1.70               | 54.18±1.53               | 2.40±0.15   | 0.12±0.01     | 24.63±0.61         | 12.06±2.09                         | 0.86±0.32                        | 0.14±0.01    | 9.96±0.54  | 2.72±0.29 | 246.81±0.68   | 0.86±0.85    | 0.73±0.61    | 134.62±4.17                          | 56.49±1.93                   | 12.68±0.83 | 27.03±0.76 | 1.61±0.06      | 248.41±2.14   |
| Arbequina R-III   | 0.58±0.01            | 1.13±0.04    | 0.49±0.00     | 0.11±0.00 | 0.33±0.00       | 11.92±0.01             | 26.48±0.22               | 25.23±0.50               | 2.18±0.07   | 0.03±0.00     | 19.36±0.07         | 5.01±0.92                          | 0.68±0.10                        | 0.14±0.00    | 9.57±0.01  | 2.29±0.12 | 223.48±7.88   | 0.13±0.19    | 0.34±0.49    | 43.99±1.12                           | 27.04±0.56                   | 11.87±0.12 | 21.54±0.00 | 1.09±0.01      | 223.96±8.56   |
| UCI-20 R-I        | 8.83±0.11            | 9.30±2.18    | 0.34±0.00     | 0.09±0.00 | 1.18±0.03       | 3.25±0.55              | 20.35±6.41               | 24.70±7.90               | 4.87±0.10   | 0.02±0.00     | 12.69±0.63         | 68.81±1.94                         | 53.15±5.57                       | 0.12±0.01    | 7.81±0.70  | 2.40±0.18 | 307.77±0.80   | 4.26±0.58    | 2.37±0.66    | 101.24±7.91                          | 87.14±11.29                  | 10.21±0.88 | 17.56±0.53 | 1.75±0.01      | 314.41±0.44   |
| UCI-20 R-II       | 4.44±0.70            | 5.13±0.71    | 0.31±0.03     | 0.06±0.01 | 0.74±0.07       | 2.87±0.17              | 13.13±2.57               | 12.14±2.08               | 4.31±0.29   | 0.01±0.00     | 12.75±1.12         | 41.91±5.48                         | 28.97±3.61                       | 0.22±0.03    | 8.42±0.91  | 1.66±0.17 | 232.49±21.84  | 1.34±0.37    | 2.74±2.82    | 62.36±8.92                           | 46.24±6.40                   | 10.08±1.08 | 17.06±1.41 | 1.33±0.13      | 236.58±24.28  |
| UCI-20 R-III      | 2.67±0.30            | 5.13±0.05    | 0.40±0.01     | 0.05±0.00 | 0.37±0.01       | 2.70±0.14              | 2.67±0.30                | 2.73±0.05                | 3.42±0.08   | 0.03±0.01     | 10.55±0.31         | 20.48±0.01                         | 11.11±1.17                       | 0.09±0.00    | 14.24±0.09 | 2.08±0.04 | 217.22±10.35  | 2.01±0.05    | 0.91±0.12    | 28.52±0.73                           | 18.97±1.27                   | 16.32±0.05 | 13.97±0.39 | 0.94±0.03      | 220.14±10.29  |
| UCI-21 R-I        | 10.45±1.19           | 3.98±0.16    | 0.84±0.02     | 0.14±0.01 | 0.30±0.00       | 2.13±0.22              | 47.65±0.20               | 24.57±0.62               | 1.45±0.09   | 0.02±0.01     | 4.47±0.50          | 125.00±1.15                        | 42.33±1.39                       | 0.03±0.00    | 8.75±0.15  | 4.82±0.47 | 338.79±41.91  | 2.20±0.33    | 2.24±1.15    | 185.23±0.06                          | 70.88±0.61                   | 13.57±0.31 | 5.91±0.58  | 1.33±0.01      | 343.24±41.09  |
| UCI-21 R-II       | 6.00±0.81            | 3.07±0.34    | 0.94±0.03     | 0.11±0.00 | 0.24±0.00       | 2.92±0.23              | 47.70±5.29               | 17.84±1.51               | 1.54±0.07   | 0.02±0.01     | 4.44±0.24          | 81.35±4.32                         | 23.22±2.63                       | 0.07±0.00    | 9.28±0.11  | 4.06±0.15 | 258.75±1.17   | 5.47±1.20    | 1.07±0.63    | 137.97±8.58                          | 44.12±3.80                   | 13.34±0.04 | 5.98±0.31  | 1.39±0.04      | 265.29±0.66   |
| UCI-21 R-III      | 3.19±0.69            | 4.07±0.14    | 1.08±0.02     | 0.09±0.01 | 0.25±0.01       | 4.00±0.35              | 20.98±0.46               | 6.15±0.11                | 1.45±0.10   | 0.02±0.00     | 3.89±0.02          | 37.86±0.38                         | 11.09±3.00                       | 0.13±0.00    | 10.33±0.46 | 3.51±0.35 | 192.03±12.92  | 5.80±0.21    | 0.78±0.32    | 66.02±0.19                           | 21.31±3.04                   | 13.84±0.81 | 5.34±0.12  | 1.57±0.03      | 198.60±12.39  |
| UCI-42 R-I        | 9.70±0.50            | 10.12±0.34   | 0.28±0.02     | 0.15±0.01 | 0.42±0.00       | 1.76±0.16              | 42.62±2.01               | 62.39±1.57               | 0.64±0.20   | 0.05±0.02     | 4.12±0.12          | 200.53±2.04                        | 213.27±5.55                      | 0.03±0.00    | 2.64±0.01  | 0.83±0.00 | 347.41±7.38   | 0.78±0.54    | 0.27±0.38    | 254.62±0.63                          | 285.79±3.65                  | 3.48±0.01  | 4.76±0.08  | 0.93±0.05      | 348.46±7.54   |
| UCI-42 R-II       | 12.89±0.65           | 9.18±0.53    | 0.16±0.01     | 0.08±0.00 | 0.40±0.01       | 1.81±0.08              | 37.49±0.52               | 41.14±0.06               | 0.52±0.18   | 0.06±0.02     | 2.56±0.35          | 297.17±5.16                        | 220.81±6.98                      | 0.02±0.00    | 3.53±0.34  | 0.92±0.08 | 344.38±4.90   | 3.25±0.52    | 1.05±0.50    | 349.36±5.12                          | 271.13±6.51                  | 4.45±0.43  | 3.08±0.53  | 0.72±0.04      | 348.69±4.897  |
| UCI-42 R-III      | 8.37±0.79            | 3.34±0.02    | 0.14±0.00     | 0.05±0.00 | 0.79±0.02       | 2.55±0.01              | 29.93±1.19               | 16.76±0.79               | 0.67±0.04   | 0.08±0.01     | 6.83±0.08          | 212.01±8.51                        | 66.62±5.01                       | 0.08±0.01    | 8.72±0.06  | 0.99±0.04 | 225.77±2.50   | 1.62±0.28    | 0.31±0.36    | 252.86±10.49                         | 86.72±4.24                   | 9.71±0.09  | 7.50±0.12  | 1.15±0.02      | 227.70±2.417  |
